# Supplementary material for: In Silico Analysis of Usher Encoding Genes in Klebsiella pneumoniae and Characterization of Their Role in Adhesion and Colonization
Source: PubMed Central journal article supplement (PMC4353729; doi:10.1371/journal.pone.0116215), 2015-03-09
Supplement: pone.0116215.s001.pdf [file pone.0116215.s001.pdf]

**Table S1.** Strains labels and accession numbers of gene encoding usher identified in *Klebsiella pneumoniae* strains genomes present in NCBI and in this study

| Fimbrial Clade | Usher Accession | Organism                                                         |
|----------------|-----------------|------------------------------------------------------------------|
| κ              | BAH64776        | <i>Klebsiella pneumoniae</i> subsp. <i>pneumoniae</i> NTUH-K2044 |
| κ              | AHE43106        | <i>Klebsiella pneumoniae</i> subsp. <i>pneumoniae</i> Kp13       |
| κ              | AHM78067        | <i>Klebsiella pneumoniae</i> 30684/NJST258_2                     |
| κ              | AHM83667        | <i>Klebsiella pneumoniae</i> 30660/NJST258_1                     |
| γ1             | AEW59011        | <i>Klebsiella pneumoniae</i> subsp. <i>pneumoniae</i> HS11286    |
| γ1             | AEW61304        | <i>Klebsiella pneumoniae</i> subsp. <i>pneumoniae</i> HS11286    |
| γ1             | ABR75730        | <i>Klebsiella pneumoniae</i> subsp. <i>pneumoniae</i> MGH 78578  |
| γ1             | ABR77102        | <i>Klebsiella pneumoniae</i> subsp. <i>pneumoniae</i> MGH 78578  |
| γ1             | ABR78394        | <i>Klebsiella pneumoniae</i> subsp. <i>pneumoniae</i> MGH 78578  |
| γ1             | ABR79828        | <i>Klebsiella pneumoniae</i> subsp. <i>pneumoniae</i> MGH 78578  |
| γ1             | BAH61229        | <i>Klebsiella pneumoniae</i> subsp. <i>pneumoniae</i> NTUH-K2044 |
| γ1             | BAH61460        | <i>Klebsiella pneumoniae</i> subsp. <i>pneumoniae</i> NTUH-K2044 |
| γ1             | BAH63378        | <i>Klebsiella pneumoniae</i> subsp. <i>pneumoniae</i> NTUH-K2044 |
| γ1             | BAH64779        | <i>Klebsiella pneumoniae</i> subsp. <i>pneumoniae</i> NTUH-K2044 |
| γ1             | BAH65073        | <i>Klebsiella pneumoniae</i> subsp. <i>pneumoniae</i> NTUH-K2044 |
| γ1             | ACI08730        | <i>Klebsiella pneumoniae</i> 342                                 |
| γ1             | ACI09288        | <i>Klebsiella pneumoniae</i> 342                                 |
| γ1             | ACI10013        | <i>Klebsiella pneumoniae</i> 342                                 |
| γ1             | ACI08659        | <i>Klebsiella pneumoniae</i> 342                                 |
| γ1             | ACI08479        | <i>Klebsiella pneumoniae</i> 342                                 |
| γ1             | AEJ96010        | <i>Klebsiella pneumoniae</i> KCTC 2242                           |
| γ1             | AEJ98151        | <i>Klebsiella pneumoniae</i> KCTC 2242                           |
| γ1             | AEJ99466        | <i>Klebsiella pneumoniae</i> KCTC 2242                           |
| γ1             | AEJ99817        | <i>Klebsiella pneumoniae</i> KCTC 2242                           |
| γ1             | AEJ99818        | <i>Klebsiella pneumoniae</i> KCTC 2242                           |
| γ1             | AGT22732        | <i>Klebsiella pneumoniae</i> JM45                                |
| γ1             | AGT23011        | <i>Klebsiella pneumoniae</i> JM45                                |
| γ1             | AGT24313        | <i>Klebsiella pneumoniae</i> JM45                                |
| γ1             | AGT26409        | <i>Klebsiella pneumoniae</i> JM45                                |
| γ1             | AGX39045        | <i>Klebsiella pneumoniae</i> CG43                                |
| γ1             | AHE42797        | <i>Klebsiella pneumoniae</i> CG43                                |
| γ1             | AHE43103        | <i>Klebsiella pneumoniae</i> subsp. <i>pneumoniae</i> Kp13       |
| γ1             | AHE44628        | <i>Klebsiella pneumoniae</i> subsp. <i>pneumoniae</i> Kp13       |
| γ1             | AHE46837        | <i>Klebsiella pneumoniae</i> subsp. <i>pneumoniae</i> Kp13       |
| γ1             | AHM77757        | <i>Klebsiella pneumoniae</i> 30684/NJST258_2                     |
| γ1             | AHM78064        | <i>Klebsiella pneumoniae</i> 30684/NJST258_2                     |
| γ1             | AHM79571        | <i>Klebsiella pneumoniae</i> 30684/NJST258_2                     |
| γ1             | AHM81882        | <i>Klebsiella pneumoniae</i> 30684/NJST258_2                     |
| γ1             | AHM83349        | <i>Klebsiella pneumoniae</i> 30660/NJST258_1                     |
| γ1             | AHM83664        | <i>Klebsiella pneumoniae</i> 30660/NJST258_1                     |
| γ1             | AHM85224        | <i>Klebsiella pneumoniae</i> 30660/NJST258_1                     |
| γ1             | AHM87517        | <i>Klebsiella pneumoniae</i> 30660/NJST258_1                     |
| γ1             | KPLM21_90123    | <i>Klebsiella pneumoniae</i> 30660/NJST258_1                     |
| γ1             | KPLM21_160040   | <i>Klebsiella pneumoniae</i> LM21                                |
| γ1             | KPLM21_610081   | <i>Klebsiella pneumoniae</i> LM21                                |
| γ1             | KPLM21_1040039  | <i>Klebsiella pneumoniae</i> LM21                                |
| γ1             | KPLM21_200008   | <i>Klebsiella pneumoniae</i> LM21                                |

|            |                |                                                    |
|------------|----------------|----------------------------------------------------|
| $\gamma_2$ | ABR78797       | Klebsiella pneumoniae subsp. pneumoniae MGH 78578  |
| $\gamma_2$ | AEJ99901       | Klebsiella pneumoniae KCTC 2242                    |
| $\gamma_2$ | AGX41005       | Klebsiella pneumoniae CG43                         |
| $\gamma_3$ | AEW59085       | Klebsiella pneumoniae subsp. pneumoniae HS11286    |
| $\gamma_3$ | ABR79894       | Klebsiella pneumoniae subsp. pneumoniae MGH 78578  |
| $\gamma_3$ | BAH61295       | Klebsiella pneumoniae subsp. pneumoniae NTUH-K2044 |
| $\gamma_3$ | ACI08146       | Klebsiella pneumoniae 342                          |
| $\gamma_3$ | AEJ96079       | Klebsiella pneumoniae KCTC 2242                    |
| $\gamma_3$ | AGT26343       | Klebsiella pneumoniae JM45                         |
| $\gamma_3$ | AGX40456       | Klebsiella pneumoniae CG43                         |
| $\gamma_3$ | AHE46764       | Klebsiella pneumoniae subsp. pneumoniae Kp13       |
| $\gamma_3$ | AHM81807       | Klebsiella pneumoniae 30684/NJST258_2              |
| $\gamma_3$ | AHM87490       | Klebsiella pneumoniae 30660/NJST258_1              |
| $\gamma_3$ | KPLM21_1000123 | Klebsiella pneumoniae LM21                         |
| $\gamma_4$ | AEW63043       | Klebsiella pneumoniae subsp. pneumoniae HS11286    |
| $\gamma_4$ | ABR78675       | Klebsiella pneumoniae subsp. pneumoniae MGH 78578  |
| $\gamma_4$ | BAH65059       | Klebsiella pneumoniae subsp. pneumoniae NTUH-K2044 |
| $\gamma_4$ | ACI09976       | Klebsiella pneumoniae 342                          |
| $\gamma_4$ | ACI06599       | Klebsiella pneumoniae 342                          |
| $\gamma_4$ | ACI10676       | Klebsiella pneumoniae 343                          |
| $\gamma_4$ | AEJ99752       | Klebsiella pneumoniae KCTC 2242                    |
| $\gamma_4$ | AFQ64205       | Klebsiella pneumoniae subsp. pneumoniae 1084       |
| $\gamma_4$ | AGT22745       | Klebsiella pneumoniae JM45                         |
| $\gamma_4$ | AGT25491       | Klebsiella pneumoniae JM45                         |
| $\gamma_4$ | AHE42813       | Klebsiella pneumoniae subsp. pneumoniae Kp13       |
| $\gamma_4$ | AHE45921       | Klebsiella pneumoniae subsp. pneumoniae Kp13       |
| $\gamma_4$ | AHE46162       | Klebsiella pneumoniae subsp. pneumoniae Kp13       |
| $\gamma_4$ | AHM77775       | Klebsiella pneumoniae 30684/NJST258_2              |
| $\gamma_4$ | AHM80923       | Klebsiella pneumoniae 30684/NJST258_2              |
| $\gamma_4$ | AHM83368       | Klebsiella pneumoniae 30660/NJST258_1              |
| $\gamma_4$ | AHM86526       | Klebsiella pneumoniae 30660/NJST258_1              |
| $\gamma_4$ | KPLM21_90135   | Klebsiella pneumoniae LM21                         |
| $\sigma$   | AEW60001       | Klebsiella pneumoniae subsp. pneumoniae HS11286    |
| $\sigma$   | ABR75944       | Klebsiella pneumoniae subsp. pneumoniae MGH 78578  |
| $\sigma$   | BAH62173       | Klebsiella pneumoniae subsp. pneumoniae NTUH-K2044 |
| $\sigma$   | AEJ96970       | Klebsiella pneumoniae KCTC 2242                    |
| $\sigma$   | AFQ67240       | Klebsiella pneumoniae subsp. pneumoniae 1084       |
| $\sigma$   | AGT25490       | Klebsiella pneumoniae JM45                         |
| $\sigma$   | AHM77758       | Klebsiella pneumoniae 30684/NJST258_2              |
| $\sigma$   | AHM80854       | Klebsiella pneumoniae 30684/NJST258_2              |
| $\sigma$   | AHM81143       | Klebsiella pneumoniae 30684/NJST258_2              |
| $\sigma$   | AHM81806       | Klebsiella pneumoniae 30684/NJST258_2              |
| $\sigma$   | AHM83350       | Klebsiella pneumoniae 30660/NJST258_1              |
| $\sigma$   | AHM86458       | Klebsiella pneumoniae 30660/NJST258_1              |
| $\sigma$   | AHM86817       | Klebsiella pneumoniae 30660/NJST258_1              |
| $\sigma$   | AHM87489       | Klebsiella pneumoniae LM21                         |
| $\sigma$   | KPLM21_220012  | Klebsiella pneumoniae LM21                         |
