# Supplementary material for: In Silico Analysis of Usher Encoding Genes in Klebsiella pneumoniae and Characterization of Their Role in Adhesion and Colonization
Source: PubMed Central journal article supplement (PMC4353729; doi:10.1371/journal.pone.0116215), 2015-03-09
Supplement: pone.0116215.s002.pdf [file pone.0116215.s002.pdf]

**Table S2.** RT-PCR analysis of usher genes expression in the  $\Delta mrkC$  mutant. Results are expressed in fold change expression ( $\pm$ SD) in the  $\Delta mrkC$  mutant compared to the wild-type strain. Expression levels were compared by nonparametric one-way ANOVA;  $p > 0.05$  (ANOVA)

| target genes | fold expression ( $\pm$ SD) compared to the wild-type strain |
|--------------|--------------------------------------------------------------|
| <i>kpaC</i>  | 1.6 $\pm$ 0.4                                                |
| <i>kpbC</i>  | 2.3 $\pm$ 0.5                                                |
| <i>kpdC</i>  | 2.1 $\pm$ 0.7                                                |
| <i>kpeC</i>  | 1.8 $\pm$ 0.7                                                |
| <i>kpgC</i>  | 1.3 $\pm$ 0.4                                                |
| <i>kpjC</i>  | 1.9 $\pm$ 0.6                                                |
| <i>fimC</i>  | 1.5 $\pm$ 0.7                                                |
